# Supplementary material
Source: Springer Nature journal article supplement (https://www.springermedizin.de/resource/supplementary/13054_2011_9922_MOESM5_ESM.pdf/9708468)

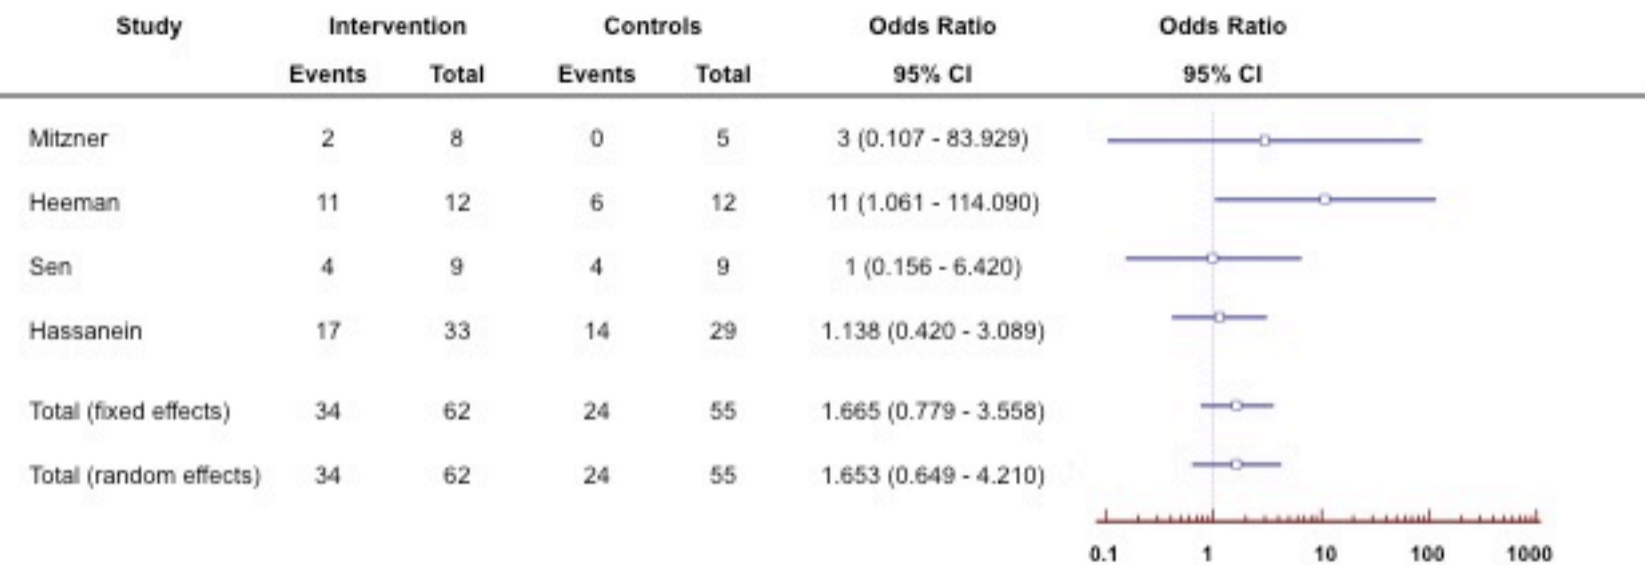

Test for heterogeneity:  $Q=3.469$ ,  $df=3$ , ( $p=0.3248$ )

Favors control

Favors MARS

Supplement: MOESM5 [file 9708468]
